# Supplementary material for: Attachment and relationship-based interventions for families during neonatal intensive care hospitalization: a study protocol for a systematic review and meta-analysis
Source: Springer Nature journal article supplement (doi:10.1186/s13643-020-01331-8), 2020-03-21
Supplement: MOESM2 [file 17820850]

## Additional file 2. 1) Medline Search strategy

Ovid MEDLINE(R) and Epub Ahead of Print, In-Process & Other Non-Indexed Citations,

Daily and Versions(R) 1946 to September 09, 2019

| Steps | Search terms and keywords                                                                                                                                        | Results |
|-------|------------------------------------------------------------------------------------------------------------------------------------------------------------------|---------|
| 1     | exp infant, premature/ or exp infant, low birth weight/ or exp premature birth/                                                                                  | 85100   |
| 2     | (infant* or baby or babies or newborn* or birth* or neonatal*).mp.                                                                                               | 1591891 |
| 3     | (premature* or low birth weight*).mp.                                                                                                                            | 213449  |
| 4     | 2 AND 3                                                                                                                                                          | 128571  |
| 5     | 1 or 4                                                                                                                                                           | 132283  |
| 6     | exp Intensive Care Units/ or exp Critical Care/ or exp critical care nursing/ or exp pediatric nursing/ or exp maternal-child nursing/ or exp nurses, pediatric/ | 140160  |
| 7     | (neonat* or newborn* or baby or babies or pediatric* or birth* or infant* or child*).mp.                                                                         | 3238302 |
| 8     | (intensive care* or care unit* or care cent* or intensive care unit*).mp.                                                                                        | 220746  |
| 9     | 7 AND 8                                                                                                                                                          | 71651   |
| 10    | 6 or 9                                                                                                                                                           | 179892  |
| 11    | exp mothers/ or exp fathers/ or exp maternal behavior/ or exp mother-child relations/ or exp father-child relations/ or exp paternal behavior/                   | 69761   |
| 12    | exp Object Attachment/                                                                                                                                           | 14508   |
| 13    | (attachment* or bond* or emotional bond* or relation* or attach* or parent* nurtur* or mother* or father* or maternal or paternal or interact* behave*).mp.      | 3386718 |
| 14    | 11 or 12 or 13                                                                                                                                                   | 3386718 |
| 15    | 5 and 10 and 14                                                                                                                                                  | 4981    |
| 16    | Randomized Controlled Trials as Topic/                                                                                                                           | 126306  |
| 17    | randomized controlled trial/                                                                                                                                     | 488817  |
| 18    | Random Allocation/                                                                                                                                               | 100342  |
| 19    | Double Blind Method/                                                                                                                                             | 153130  |
| 20    | Single Blind Method/                                                                                                                                             | 27263   |
| 21    | clinical trial/                                                                                                                                                  | 517804  |

|    |                                                                           |         |
|----|---------------------------------------------------------------------------|---------|
| 22 | clinical trial, phase i.pt                                                | 19272   |
| 23 | clinical trial, phase ii.pt                                               | 31119   |
| 24 | clinical trial, phase iii.pt                                              | 15487   |
| 25 | clinical trial, phase iv.pt                                               | 1743    |
| 26 | controlled clinical trial.pt                                              | 93272   |
| 27 | randomized controlled trial.pt                                            | 488817  |
| 28 | multicenter study.pt                                                      | 256105  |
| 29 | clinical trial.pt                                                         | 517804  |
| 30 | exp Clinical Trials as topic/                                             | 329910  |
| 31 | or/16-30                                                                  | 1311950 |
| 32 | (clinical adj trial\$.tw.                                                 | 341088  |
| 33 | ((singl\$ or doubl\$ or treb\$ or tripl\$) adj (blind\$3 or mask\$3)).tw. | 165975  |
| 34 | PLACEBOS/                                                                 | 34457   |
| 35 | placebo\$.tw                                                              | 207101  |
| 36 | randomly allocated.tw                                                     | 26869   |
| 37 | (allocated adj2 random\$).tw.                                             | 30061   |
| 38 | or/32-37                                                                  | 600676  |
| 39 | 31 or 38                                                                  | 1560431 |
| 40 | case report.tw                                                            | 293766  |
| 41 | letter/                                                                   | 1041316 |
| 42 | historical article/                                                       | 353707  |
| 43 | or/40-42                                                                  | 1673674 |
| 44 | 39 not 43                                                                 | 1525076 |
| 45 | 15 and 44                                                                 | 728     |
| 46 | limit 45 to english language                                              | 701     |
| 47 | limit 46 to yr="1999 -Current"                                            | 614     |

## 2) Embase (Ovid) Search strategy

Embase1976 to 2019 Week 35

| Steps | Search terms and keywords                                                                                                                                   | Results   |
|-------|-------------------------------------------------------------------------------------------------------------------------------------------------------------|-----------|
| 1     | exp prematurity/ or exp low birth weight/                                                                                                                   | 137,489   |
| 2     | (infant* or baby or babies or newborn* or birth* or neonatal*).mp.                                                                                          | 1,511,254 |
| 3     | (premature* or low birth weight*).mp.                                                                                                                       | 249,170   |
| 4     | 2 AND 3                                                                                                                                                     | 129,507   |
| 5     | 1 or 4                                                                                                                                                      | 186,042   |
| 6     | exp Intensive Care Units/ or exp intensive care/ or exp maternal child health care/ or exp pediatric nurse/ or exp pediatric nursing/                       | 788,831   |
| 7     | (neonat* or newborn* or baby or babies or pediatric* or birth* or infant* or child*).mp.                                                                    | 3,523,991 |
| 8     | (intensive care* or care unit* or care cent* or intensive care unit*).mp.                                                                                   | 435,861   |
| 9     | 7 AND 8                                                                                                                                                     | 117,030   |
| 10    | 6 or 9                                                                                                                                                      | 822,328   |
| 11    | exp mother/ or exp father/ or exp maternal behavior/ or exp mother child relation/ or exp father child relation/ or exp paternal behavior/                  | 155,370   |
| 12    | exp Object Attachment/                                                                                                                                      | 11,249    |
| 13    | (attachment* or bond* or emotional bond* or relation* or attach* or parent* nurtur* or mother* or father* or maternal or paternal or interact* behave*).mp. | 3,525,171 |
| 14    | 11 or 12 or 13                                                                                                                                              | 3,525,591 |
| 15    | 5 and 10 and 14                                                                                                                                             | 11,586    |
| 16    | Clinical Trial/                                                                                                                                             | 962,515   |
| 17    | Randomized Controlled Trial/                                                                                                                                | 569,054   |
| 18    | controlled clinical trial/                                                                                                                                  | 464,842   |
| 19    | multicenter study/                                                                                                                                          | 228,625   |
| 20    | Phase 3 clinical trial/                                                                                                                                     | 42,348    |
| 21    | Phase 4 clinical trial/                                                                                                                                     | 3,598     |
| 22    | exp RANDOMIZATION/                                                                                                                                          | 84,318    |
| 23    | Single Blind Procedure/                                                                                                                                     | 35,509    |
| 24    | Double Blind Procedure/                                                                                                                                     | 165,321   |
| 25    | randomi?ed controlled trial\$.tw.                                                                                                                           | 211,067   |

|    |                                     |           |
|----|-------------------------------------|-----------|
| 26 | single blind\$.tw.                  | 23,620    |
| 27 | double blind\$.tw.                  | 202,337   |
| 28 | ((treble or triple) adj blind\$.tw. | 1,035     |
| 29 | or/16-28                            | 1,611,942 |
| 30 | Case Study/                         | 64,141    |
| 31 | case report.tw.                     | 392,332   |
| 32 | abstract report/ or letter/         | 1,120,797 |
| 33 | Conference proceeding.pt.           | 0         |
| 34 | Conference abstract.pt.             | 3,556,821 |
| 35 | Editorial.pt.                       | 631,008   |
| 36 | Letter.pt.                          | 1,085,674 |
| 37 | Note.pt.                            | 771,398   |
| 38 | or/30-37                            | 6,475,332 |
| 39 | 29 not 38                           | 1,226,563 |
| 40 | 15 and 39                           | 1,057     |
| 41 | limit 40 to english language        | 1,009     |
| 42 | limit 42 to yr="1999 -Current"      | 926       |

### 3) PsycINFO Search strategy

PsycINFO1987 to September Week 1 2019

| Steps | Search terms and keywords                                                                                                                                    | Results |
|-------|--------------------------------------------------------------------------------------------------------------------------------------------------------------|---------|
| 1     | exp Premature Birth/ or exp Postnatal Period/ or exp Neonatal Period/ or exp Neonatal Development/ or exp Birth/ or exp Birth Weight/                        | 19798   |
| 2     | (infant* or baby or babies or newborn* or birth* or neonatal*).mp.                                                                                           | 145967  |
| 3     | (premature* or low birth weight*).mp.                                                                                                                        | 18374   |
| 4     | 2 AND 3                                                                                                                                                      | 8750    |
| 5     | 1 or 4                                                                                                                                                       | 22094   |
| 6     | exp Neonatal Intensive Care/ or exp Intensive Care/                                                                                                          | 5337    |
| 7     | (neonat* or newborn* or baby or babies or pediatric* or birth* or infant* or child*).mp.                                                                     | 684514  |
| 8     | (intensive care* or care unit* or care cent* or intensive care unit*).mp.                                                                                    | 16199   |
| 9     | 7 AND 8                                                                                                                                                      | 6403    |
| 10    | 6 or 9                                                                                                                                                       | 9402    |
| 11    | exp Mothers/ or exp Mother Child Relations/ or exp Mother Child Communication/ or exp Fathers/ or exp Father Child Relations/ or exp Parent Child Relations/ | 83279   |
| 12    | exp Object Relations/ or exp Attachment Behavior/                                                                                                            | 27994   |
| 13    | (attachment* or bond* or emotional bond* or relation* or attach* or parent* nurtur* or mother* or father* or maternal or paternal or interact* behave*).mp.  | 942236  |
| 14    | 11 or 12 or 13                                                                                                                                               | 948349  |
| 15    | 5 and 10 and 14                                                                                                                                              | 895     |
| 16    | limit 15 to english language                                                                                                                                 | 764     |
| 17    | limit 16 to yr="1999 -Current"                                                                                                                               | 764     |

## 4) PubMed Search strategy

PubMed1951 to September Week 1 2019

| Steps | Search terms and keywords                                                                                                                                                                 | Results   |
|-------|-------------------------------------------------------------------------------------------------------------------------------------------------------------------------------------------|-----------|
| 1     | infant, newborn[MeSH] OR newborn OR neonate OR neonatal OR OR premature OR low birth weight OR VLBW OR LBW OR birth* OR child* OR infan* OR neonat*                                       | 3,502,486 |
| 2     | intensive care unit, neonatal[MeSH] OR critical care[MeSH] OR mother-child nursing[MeSH] OR nurses, neonatal[MeSH] or intensive care* or care unit* or care cent* or intensive care unit* | 324,659   |
| 3     | 1 OR 2                                                                                                                                                                                    | 3,730,987 |
| 4     | object attachment[MeSH] OR parent-child relations[MeSH] OR maternal behavior[MeSH] OR mothers[MeSH] OR paternal behavior[MeSH] OR fathers[MeSH]                                           | 109,500   |
| 5     | attachment* or bond* or emotional bond* or relation* or attach* or parent* or maternal* or paternal* or interact* or infant-mother* or mother-infant* infant-father* or father-infant*    | 185       |
| 6     | randomised controlled trial [pt] or randomized controlled trial [pt] OR controlled clinical trial [pt] OR randomized [tiab] OR randomized [tiab] OR randomly [tiab] OR trial [tiab]       | 1,263,005 |
| 7     | 4 OR 5                                                                                                                                                                                    | 109,546   |
| 8     | 6 AND 7                                                                                                                                                                                   | 5,509     |
| 9     | 3 AND 8                                                                                                                                                                                   | 5,005     |
| 10    | 9 AND (English).lg                                                                                                                                                                        | 4,844     |
| 11    | Limit 10 to yr = "1999 – 2019"                                                                                                                                                            | 4,235     |

## 5) CINAHL Search strategy

CINAHL1939 to September Week 1 2019

| Steps | Search terms and keywords                                                                                                                                                                                                                                                                                                                  | Results   |
|-------|--------------------------------------------------------------------------------------------------------------------------------------------------------------------------------------------------------------------------------------------------------------------------------------------------------------------------------------------|-----------|
| 1     | (infant, newborn OR newborns or neonates or infants) OR (newborn or neonate or infant or baby) OR (premature infants or preterm infants or premature baby or preterm baby) OR (low birth weight or small for gestational age or low weight) OR VLBW OR LBW or Newborn or infan* or neonat*                                                 | 428,264   |
| 2     | (intensive care unit or icu or critical care or critical care unit) OR (neonatal intensive care unit or nicu or baby unit or newborn intensive care) OR nicu care OR neonatal intensive care                                                                                                                                               | 116,856   |
| 3     | 1 OR 2                                                                                                                                                                                                                                                                                                                                     | 516,069   |
| 4     | (MH "attachment+") OR (MH "bonding+") OR (MH "relationship")                                                                                                                                                                                                                                                                               | 1,194     |
| 5     | attachment behavior OR (attachment or relationship or bonding) OR (attach* or bond* or relation* or interaction*) OR (emotional bond or emotional bonding) OR (infant-mother attachment OR infant-father attachment) OR (infant-mother* or mother-infant* or infant-father* or father-infant*) OR (attachment-based or relationship-based) | 726,692   |
| 6     | 4 OR 5                                                                                                                                                                                                                                                                                                                                     | 726,884   |
| 7     | (MH "Clinical Trials+")                                                                                                                                                                                                                                                                                                                    | 266,405   |
| 8     | TX allocat* random*                                                                                                                                                                                                                                                                                                                        | 19,816    |
| 9     | (MH "Quantitative Studies")                                                                                                                                                                                                                                                                                                                | 23,312    |
| 10    | TX random* allocat*                                                                                                                                                                                                                                                                                                                        | 19,816    |
| 11    | (MH "Random Assignment")                                                                                                                                                                                                                                                                                                                   | 56,415    |
| 12    | TX randomi* control* trial*                                                                                                                                                                                                                                                                                                                | 256,383   |
| 13    | TX ( (singl* n1 blind*) or (singl* n1 mask*) )                                                                                                                                                                                                                                                                                             | 20,304    |
| 14    | TX ( (doubl* n1 blind*) or (doubl* n1 mask*) )                                                                                                                                                                                                                                                                                             | 1,046,681 |
| 15    | TX ( (tripl* n1 blind*) or (tripl* n1 mask*) )                                                                                                                                                                                                                                                                                             | 698       |
| 16    | TX ( (trebl* n1 blind*) or (trebl* n1 mask*) )                                                                                                                                                                                                                                                                                             | 11        |
| 17    | TX clinic* n1 trial*                                                                                                                                                                                                                                                                                                                       | 346,116   |
| 18    | PT Clinical trial                                                                                                                                                                                                                                                                                                                          | 86,865    |
| 19    | 7 OR 8 OR 9 OR 10 OR 11 OR 12 OR 13 OR 14 OR 15 OR 16 OR 17 OR 18                                                                                                                                                                                                                                                                          | 1,455,200 |
| 20    | 6 AND 19                                                                                                                                                                                                                                                                                                                                   | 184,618   |
| 21    | 3 AND 20                                                                                                                                                                                                                                                                                                                                   | 18,659    |

|    |                               |        |
|----|-------------------------------|--------|
| 22 | Limit 7 to yr = "1999 – 2019" | 16,870 |
| 23 | Limit 22 to english language  | 15,524 |



## 6) Cochrane Library Search strategy

Cochrane Library 1944 to September Week 1 2019

| Steps | Search terms and keywords                                                                                                                                                                                                                                              | Results |
|-------|------------------------------------------------------------------------------------------------------------------------------------------------------------------------------------------------------------------------------------------------------------------------|---------|
| 1     | MeSH descriptor: [Infant, Newborn] explode all trees                                                                                                                                                                                                                   | 15,243  |
| 2     | (Infant*):ti,ab,kw OR (baby):ti,ab,kw OR (babies):ti,ab,kw OR (newborn*):ti,ab,kw OR (neonat*):ti,ab,kw                                                                                                                                                                | 71,887  |
| 3     | (prematu*):ti,ab,kw OR (preterm):ti,ab,kw OR (low * weight):ti,ab,kw OR (LBW):ti,ab,kw OR (VLBW):ti,ab,kw                                                                                                                                                              | 26,774  |
| 4     | 2 AND 3                                                                                                                                                                                                                                                                | 16,077  |
| 5     | 1 OR 4                                                                                                                                                                                                                                                                 | 25,577  |
| 6     | MeSH descriptor: [Object Attachment] explode all trees                                                                                                                                                                                                                 | 357     |
| 7     | MeSH descriptor: [Family Relations] explode all trees                                                                                                                                                                                                                  | 2916    |
| 8     | (attachment*):ti,ab,kw OR (bond*):ti,ab,kw OR (relation*):ti,ab,kw OR (interact*):ti,ab,kw OR (mother near/2 infant*):ti,ab,kw OR (parent near/2 infant*):ti,ab,kw OR (father near/2 infant*):ti,ab,kw OR (attachment-based):ti,ab,kw OR (relationship-based):ti,ab,kw | 171,377 |
| 9     | 6 OR 7 OR 8                                                                                                                                                                                                                                                            | 171,844 |
| 10    | MeSH descriptor: [Clinical Study] explode all trees                                                                                                                                                                                                                    | 150     |
| 11    | (randomized controlled*):ti,ab,kw OR (randomised controlled):ti,ab,kw OR (rct):ti,ab,kw OR (clinical trial):ti,ab,kw                                                                                                                                                   | 720,816 |
| 12    | 10 OR 11                                                                                                                                                                                                                                                               | 720,818 |
| 13    | 5 AND 9 AND 13                                                                                                                                                                                                                                                         | 1803    |
